# Supplementary material for: Porcine Respiratory Coronavirus (PRCV): Isolation and Characterization of a Variant PRCV from USA Pigs
Source: MDPI journal article supplement (doi:10.3390/pathogens12091097), 2023-08-28
Supplement: s1 [file s1]

## Supplementary Materials

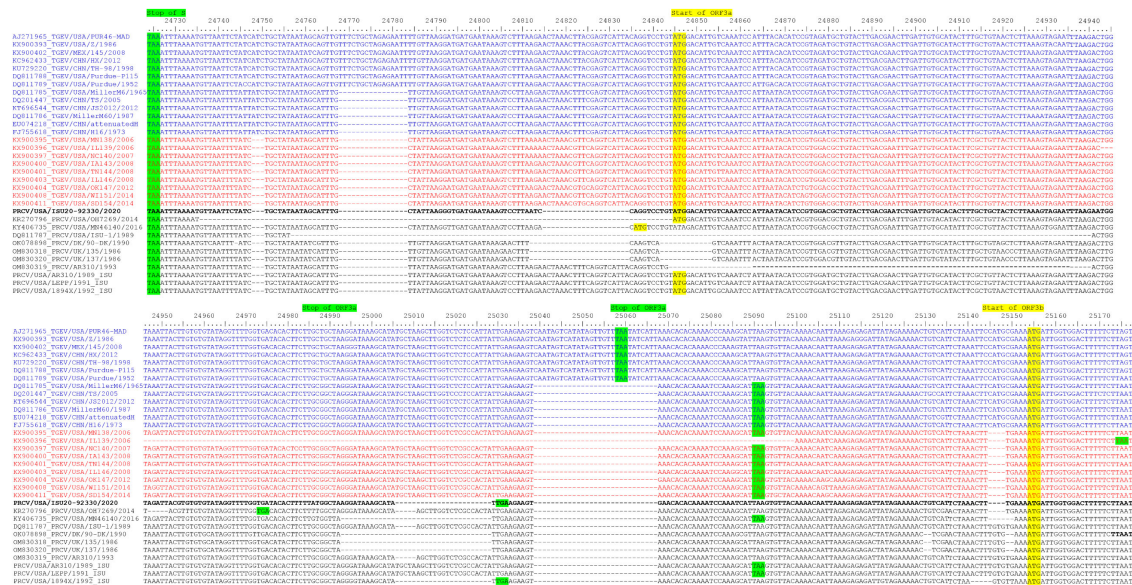

**Figure S1:** Comparison of the intergenic region between S and ORF3a genes, ORF3a gene, and the intergenic region between ORF3a and ORF3b genes of traditional TGEVs, variant TGEVs, and PRCVs. The representative traditional TGEVs are shown in blue color and the representative variant TGEVs are shown in red color. Nucleotides are numbered according to TGEV PUR46-MAD sequence (GenBank accession number AJ271965).

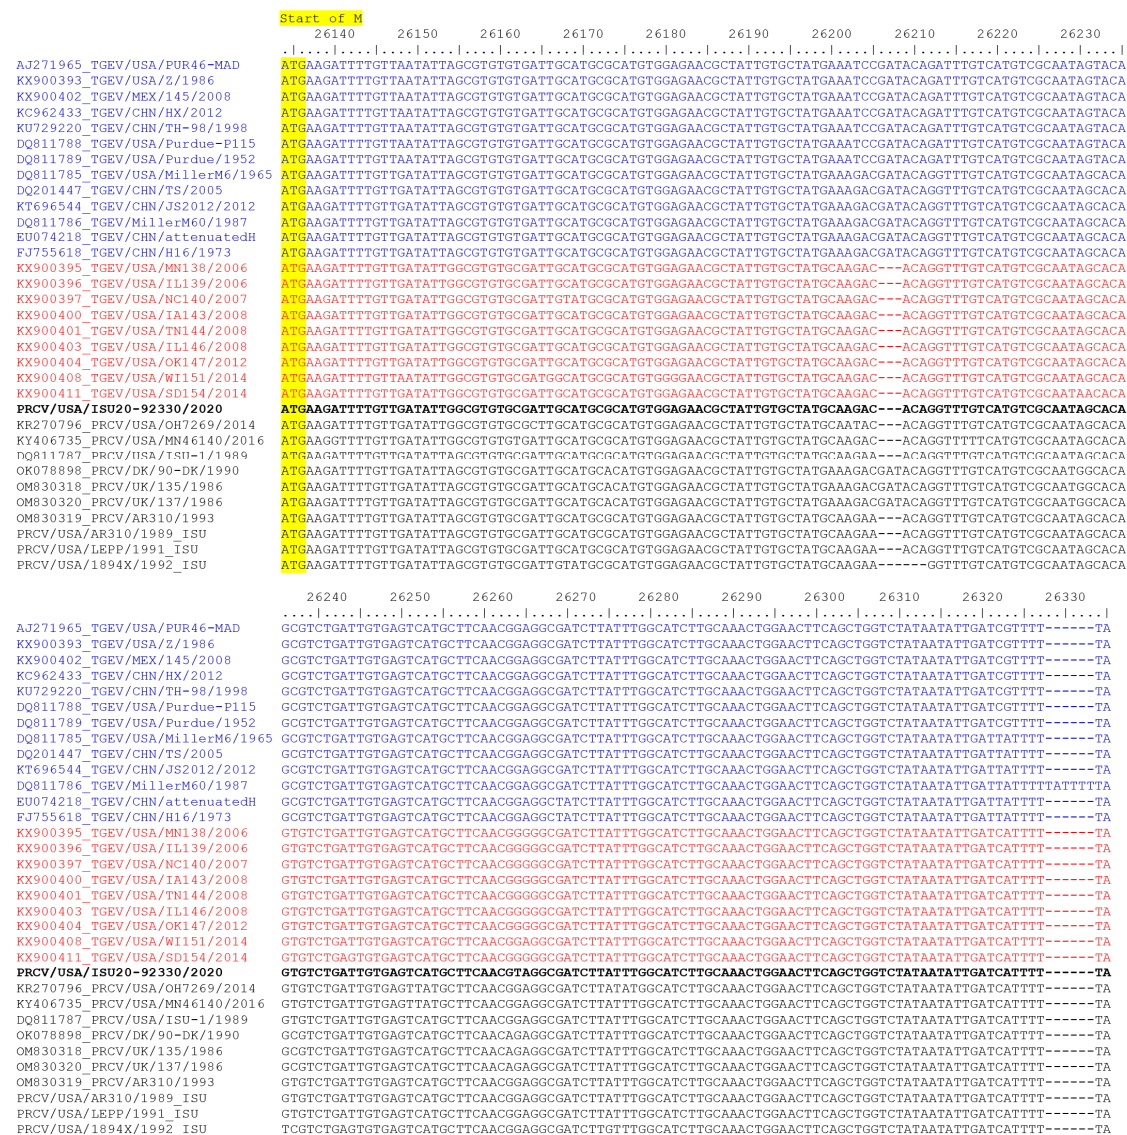

**Figure S2.** Comparison of M gene of traditional TGEVs, variant TGEVs, and PRCVs. The representative traditional TGEVs are shown in blue color and the representative variant TGEVs are shown in red color. Nucleotides are numbered according to TGEV PUR46-MAD sequence (GenBank accession number AJ271965).
